# Preoperative Evaluation Clinic Visit Is Associated with Decreased Risk of In-hospital Postoperative Mortality

Jeanna D. Blitz, M.D., Samir M. Kendale, M.D., Sudheer K. Jain, M.D., Germaine E. Cuff, Ph.D., Jung T. Kim, M.D., Andrew D. Rosenberg, M.D.

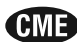

This article has been selected for the ANESTHESIOLOGY CME Program. Learning objectives and disclosure and ordering information can be found in the CME section at the front of this issue.

## ABSTRACT

**Background:** As specialists in perioperative medicine, anesthesiologists are well equipped to design and oversee the preoperative patient preparation process; however, the impact of an anesthesiologist-led preoperative evaluation clinic (PEC) on clinical outcomes has yet to be fully elucidated. The authors compared the incidence of in-hospital postoperative mortality in patients who had been evaluated in their institution's PEC before elective surgery to the incidence in patients who had elective surgery without being seen in the PEC.

**Methods:** A retrospective review of an administrative database was performed. There were 46 deaths from 64,418 patients (0.07%): 22 from 35,535 patients (0.06%) seen in PEC and 24 from 28,883 patients (0.08%) not seen in PEC. After propensity score matching, there were 13,964 patients within each matched set; there were 34 deaths (0.1%). There were 11 deaths from 13,964 (0.08%) patients seen in PEC and 23 deaths from 13,964 (0.16%) patients not seen in PEC. A subanalysis to assess the effect of a PEC visit on deaths as a result of failure to rescue (FTR) was also performed.

**Results:** A visit to PEC was associated with a reduction in mortality (odds ratio, 0.48; 95% CI, 0.22 to 0.96,  $P = 0.04$ ) by comparison of the matched cohorts. The FTR subanalysis suggested that the proportion of deaths attributable to an unanticipated surgical complication was not significantly different between the two groups ( $P = 0.141$ ).

**Conclusions:** An in-person assessment at the PEC was associated with a reduction in in-hospital mortality. It was difficult to draw conclusions about whether a difference exists in the proportion of FTR deaths between the two cohorts due to small sample size. (ANESTHESIOLOGY 2016; 125:280-94)

VALUE-BASED management initiatives in health care have led to the expansion and transformation of the anesthesiologist's role.<sup>1</sup> The preoperative evaluation clinic (PEC) provides an opportunity to demonstrate expertise in perioperative patient care and systems design as perioperative medicine consultants. Many key elements of a successful perioperative surgical home can be initiated in an anesthesiologist-led PEC, such as early anesthesiologist access to patients; increased preoperative counseling by anesthesiologists; increased communication between providers and patients; anesthesiologist involvement in protocol development; and coordination of postoperative care to reduce pain, complications, morbidity, and mortality.<sup>2-4</sup> Previous studies of anesthesiologist-directed PECs have demonstrated that a well-designed PEC can reduce preoperative consultations, decrease surgical cancellations due to inadequate preoperative preparation, and reduce costs associated with unnecessary testing.<sup>5-8</sup> Furthermore, data suggest that standardized, surgery-specific clinical protocols that include a preoperative patient engagement component improve efficiency, reduce day of surgery case cancellations, decrease hospital length of stay, and reduce readmission rates, which translate to a cost savings for the institution.<sup>5,9-16</sup> However, these studies do not specifically address the contribution of a PEC to the improvement in clinical outcomes.

### What We Already Know about This Topic

- Dedicated preoperative evaluation clinics allow for early patient access to anesthesiologists, increased preoperative counseling, increased communication between providers and patients, anesthesiologist involvement in protocol development, and coordination of postoperative care to reduce pain, complications, morbidity, and mortality
- Previous studies of well-designed anesthesiologist-directed preoperative evaluation clinics have demonstrated that these clinics can reduce preoperative consultations, decrease surgical cancellations due to inadequate preoperative preparation, and reduce costs associated with unnecessary testing

### What This Article Tells Us That Is New

- An in-person assessment in an anesthesiologist-led preoperative evaluation clinic was associated with a reduction in in-hospital mortality.

Failure to rescue (FTR) is defined as death after a postoperative complication.<sup>17</sup> Strategies to reduce FTR mortality rely on interventions that occur in the postoperative period, after the complication has occurred and been recognized.<sup>18</sup> By contrast, a PEC may provide the opportunity to reduce non-FTR mortality through the preoperative identification and optimization of high-risk patients. However, whether a PEC visit can influence postoperative mortality of either type has not been determined.

This article is featured in "This Month in Anesthesiology," page 1A. This article has an audio podcast.

Submitted for publication August 31, 2015. Accepted for publication April 13, 2016. Corrected on February 14, 2017. From the Department of Anesthesiology, Perioperative Care and Pain Medicine, New York University School of Medicine, New York, New York.

Copyright © 2016, the American Society of Anesthesiologists, Inc. Wolters Kluwer Health, Inc. All Rights Reserved. Anesthesiology 2016; 125:280-94

Our PEC is a free-standing outpatient clinic, which serves a tertiary and quaternary care academic medical center. Moderate- to high-risk patients are referred to our institution's PEC with the goals of improving patient education and engagement and coordinating the plan of care before surgery. We hypothesized that the anesthesiologist-directed, standardized preoperative evaluation process that patients underwent in our PEC was superior to the preoperative evaluation process that occurred outside of PEC with regard to patient outcomes. We compared the incidence of in-hospital postoperative mortality in patients who were evaluated before elective surgery in our institution's PEC to the incidence in those patients who had elective surgery without being seen in the PEC. We then noted the number of FTR deaths that occurred in each cohort.

## Materials and Methods

### *Preoperative Evaluation Clinic Structure and Activities*

Our PEC is a free-standing outpatient clinic, open from 8:00 AM to 8:00 PM on weekdays; it is staffed on-site by 2 attending anesthesiologists, 1 resident anesthesiologist, 6 nurse practitioners (NPs), and 10 registered nurses (RNs), as well as 3 patient care technicians (PCTs). On Saturdays, the PEC is open from 8:00 AM to 4:00 PM and is staffed by one attending anesthesiologist, one NP, three RNs, and one PCT. Our PEC provided in-person assessments to an average of 60 patients per day on weekdays and 18 patients per day on Saturdays during the time frame studied in this analysis, which was approximately 55% of the annual surgical volume.

Patients were identified as requiring an in-person assessment in PEC through the use of a screening tool that was administered in the surgeon's office (appendix 1). The tool was readily accessible both in paper form and *via* our institution's Web site. The screening tool consisted of a list of medical comorbidities; it was created by the anesthesiologist-director of PEC and approved by the medical board at our institution. When the patient required an assessment in PEC, this was explained to the patient, and the appointment was scheduled by secretarial staff in the surgeon's office with the patient present. Whether or not the patient needed a PEC evaluation was included as a required element on the surgical case request form. If a patient who required a PEC assessment had not been evaluated in PEC by 72 h before surgery, the patient was contacted by secretarial staff in PEC to schedule an appointment. Multiple efforts were made to schedule the patient for the recommended assessment; however, whether or not to undergo a preoperative evaluation at the clinic was ultimately the patient's decision. No patients were refused a PEC clinic appointment: all self- and surgeon-referred patients were assessed in PEC.

Not every patient in PEC met with an anesthesiologist; certain low- and intermediate-risk patients were preassigned to meet with a NP who had received training in preoperative assessment and anesthesia care. The patient's electronic

health record was reviewed by our NP staff 3 days before the scheduled PEC visit. Using an algorithm created by the anesthesiologist-director of PEC, the NP assigned patients to one of three groups: preoperative evaluation with an anesthesiologist, preoperative evaluation with a NP, or "fast-track" status: the patient will meet only with an RN and PCT. The algorithm included the complexity of the patient's preoperative comorbidities and medication list and the severity of the planned surgical procedure (appendices 2 and 3). When the electronic health record contained insufficient data, or a patient arrived at PEC as an "add-on," the patient was assigned to be evaluated by an anesthesiologist. All patients who visited the clinic were subjected to a standardized preoperative evaluation process and patient education methods, which had been developed by the anesthesiologist-director of PEC. During the time period analyzed, the PEC utilized protocols for the preoperative workup of preexisting cardiac conditions, cardiac stents and implantable cardiac devices, the preoperative workup and management of diabetes and hypertension, and the preoperative management of antiplatelet and anticoagulation medications. These protocols were devised by an anesthesiologist-led hospital committee that consisted of anesthesiologists, surgeons, medical subspecialists, and nursing leadership. The determination of a patient as not a surgical candidate due to the severity of preexisting medical conditions was a joint decision between the anesthesiologist evaluating the patient in PEC, the surgeon, and the patient.

Patients who were not evaluated in the PEC received their preoperative instructions and education from their surgeon and/or primary medicine physician, who also coordinated the plan of care. For these patients, exposure to an in-person preanesthesia evaluation by an anesthesiologist was limited to an assessment and discussion with the anesthesiologist assigned to the case immediately before surgery. This is consistent with the traditional, sequential model of perioperative care described in the literature.<sup>19</sup> No comorbidity-specific or procedure-specific enhanced recovery protocols were in place for the intraoperative or postoperative phase of care during the time interval used for our analysis.

### *Data*

We performed a retrospective review of an administrative database that had been stripped of patient identifiers; the only charts reviewed were of deceased persons. The institutional review board at our institution determined that this analysis did not constitute human subject research. The database consisted of 76,601 patients who had procedures between June 2011 and June 2013 at a single, urban academic medical center and contained information including date of procedure, procedure type, emergency status, certain preoperative comorbidities (coronary artery disease [CAD], history of stroke, congestive heart failure, diabetes mellitus, hypertension, atrial fibrillation, obesity, dementia, cancer, human immunodeficiency virus, and chronic obstructive pulmonary disease), gender, age, American Society of

Anesthesiologists (ASA) physical classification score, Johns Hopkins surgical grade, in-hospital mortality, and whether or not the patient was seen in the PEC before the procedure. In-hospital mortality referred to any patient who died in the hospital after a procedure. Diagnoses were determined based on *International Classification of Diseases*, Ninth Revision codes, which were obtained from coded discharge data. Codes for preoperative diagnoses were able to be entered by any clinician responsible for the patient's care in the perioperative period, including the surgeon and his or her clinical staff, clinicians in PEC, clinical staff in the preoperative area on the day of surgery, the anesthesiologist assigned to the case, clinical staff responsible for the patient's postoperative care, and the patient's medical doctor(s) or referring physician. The only missing data points were in cases that did not have an assigned Johns Hopkins surgical grade due to being missed during the assignment process; these cases were excluded. Canceled cases and patients who underwent emergency procedures were excluded. Emergency procedures were those that were booked as emergent or those in which the patient was admitted *via* the emergency room. All elective procedures performed with anesthesia care were included in the analysis, including cases performed in the operating room and off-site locations such as the interventional radiology and endoscopy suites. Tracheotomy and percutaneous endoscopic gastrostomy (PEG) procedures that were performed on patients in the intensive care unit were included in the analysis only if the patient had undergone an elective surgery during that same hospital admission before the tracheotomy or PEG procedure. Patients who had been seen in PEC before the elective surgery that preceded the tracheotomy or PEG procedure were included in the PEC group for the analysis although they had not been reevaluated in PEC before the tracheotomy or PEG procedure.

All patients studied underwent their procedure at the same institution and were subjected to the standard of care at our urban, academic medical center.

### Statistical Analysis

The Matching Package<sup>20</sup> for the R statistical software (version 3.1.1, The R Foundation for Statistical Computing, Austria) was utilized for propensity score matching and assessment of postmatch balance; a greedy match was performed. Propensity score for being seen at PEC was determined using logistic regression based on preoperative medical comorbidities, including CAD, history of stroke, diabetes mellitus, hypertension, atrial fibrillation, obesity, dementia, cancer, human immunodeficiency virus, and chronic obstructive pulmonary disease; age; ASA score; Johns Hopkins surgical grade; and gender. The medical comorbidity covariates were chosen due to inclusion within the Charlson Comorbidity Index.<sup>21</sup> Johns Hopkins surgical grade<sup>22,23</sup> was chosen as a measure to classify and categorize the severity of the surgical procedure. One to one nearest neighbor propensity score matching without replacement using Mahalanobis distance metric

weighting and a caliper width of 0.2 SDs was performed based on the derived propensity scores, using a visit to PEC as the treatment variable and estimating the average treatment effect on the treated (appendix 4). Match balance was considered adequate for standardized mean difference less than 0.1 and by visualizing q-q plots when applicable for continuous variables. Univariate logistic regression was performed on the matched set using a visit to PEC as the independent variable and in-hospital mortality as the dependent variable. Using univariate logistic regression allowed specific identification of the dependent and independent variables, as opposed to a Pearson chi-square test. In order to consider the possibility that the matched pairs are derived from the same multivariate distribution, McNemar chi-square test was also conducted. To confirm that no additional confounder was present due to the referral patterns of certain surgical services, an additional analysis by surgical service was performed. Additional analysis by specific surgeon could not be performed due to the large number of surgeons in the database.

An additional subanalysis involved assessment of whether the death was as a result of an intraoperative or postoperative complication that could not have been anticipated preoperatively, and thus could not be mitigated by preoperative interventions. Designation as a FTR death, defined as an in-hospital death after an adverse occurrence such as a major surgical complication,<sup>3,17</sup> was assigned *post hoc* to the subset of deceased patients. The following diagnoses were used to define a major surgical complication: shock or cardiac arrest, respiratory arrest or failure, pneumonia, upper gastrointestinal bleeding, sepsis, and venothromboembolism.<sup>24</sup> Three separate reviewers performed chart reviews to assign FTR, all of whom were blinded as to PEC status. To minimize the effect of sicker patients visiting the PEC, this subanalysis was performed on the matched cohorts, and McNemar chi-square test was used.

### Results

After exclusion, 64,418 patients remained for analysis. Of these patients, 35,535 (55%) had been seen in PEC. There were 46 deaths (0.07%): 22 of 35,535 (0.06%) patients seen in PEC and 24 of 28,883 (0.08%) patients not seen in PEC. Before matching, univariate analysis of the association between being seen at PEC and death did not demonstrate significance ( $P = 0.32$ ). Patients who visited PEC were older, with a mean age of 50 yr (table 1), and had a greater incidence of CAD, hypertension, and obesity than those who did not. They also underwent procedures with higher Johns Hopkins surgical grades and were more frequently ASA II or III. Patients with an ASA score of I and those with cancer were less likely to have been seen at PEC.

The median propensity score for being seen in PEC before matching was 0.67 (interquartile range, 0.27 to 0.83) and after matching was 0.50 (interquartile range, 0.48 to 0.52). After propensity score matching, there were 13,964 patients within each cohort (fig. 1); there were 34 deaths (0.1%). There were 11 deaths from 13,964 (0.08%) patients seen in

**Table 1.** Patient Demographics before Propensity Score Matching

| Before Matching                    | Seen in PEC<br>(n = 35,535) | Not Seen in PEC<br>(n = 28,883) | Entire Cohort<br>(n = 64,418) | Standardized Mean Difference<br>before Matching |
|------------------------------------|-----------------------------|---------------------------------|-------------------------------|-------------------------------------------------|
| Age, yr (mean $\pm$ SD)            | 50 $\pm$ 18                 | 45 $\pm$ 23                     | 48 $\pm$ 21                   | 0.31                                            |
| Gender                             |                             |                                 |                               | -0.04                                           |
| Male                               | 15,591 (44)                 | 13,266 (46)                     | 28,857 (45)                   |                                                 |
| Female                             | 19,944 (56)                 | 15,617 (54)                     | 35,561 (55)                   |                                                 |
| Coronary artery disease            | 2,203 (6)                   | 1,301 (5)                       | 3,504 (5)                     | 0.07                                            |
| History of stroke                  | 256 (0.7)                   | 63 (0.2)                        | 319 (0.5)                     | 0.06                                            |
| Congestive heart failure           | 689 (2)                     | 455 (2)                         | 1,144 (2)                     | 0.03                                            |
| Diabetes mellitus                  | 3,311 (9)                   | 2,001 (7)                       | 5,312 (8)                     | 0.08                                            |
| Hypertension                       | 10,088 (28)                 | 5,784 (20)                      | 15,871 (25)                   | 0.2                                             |
| Atrial fibrillation                | 682 (2)                     | 265 (0.9)                       | 947 (1)                       | 0.07                                            |
| Obesity                            | 3,165 (9)                   | 952 (3)                         | 4,117 (6)                     | 0.2                                             |
| Dementia                           | 245 (0.7)                   | 124 (0.4)                       | 369 (0.6)                     | 0.03                                            |
| HIV                                | 268 (0.8)                   | 188 (0.7)                       | 456 (0.7)                     | 0.01                                            |
| Cancer                             | 6,254 (18)                  | 7,046 (24)                      | 13,299 (21)                   | -0.2                                            |
| COPD                               | 852 (2)                     | 448 (2)                         | 1,300 (2)                     | 0.06                                            |
| Johns Hopkins surgical<br>grade    |                             |                                 |                               |                                                 |
| 1                                  | 1,951 (5)                   | 5,058 (18)                      | 7,009 (11)                    | -0.3                                            |
| 2                                  | 11,632 (33)                 | 11,367 (39)                     | 22,999 (36)                   | -0.14                                           |
| 3                                  | 14,625 (41)                 | 10,450 (36)                     | 25,075 (39)                   | 0.1                                             |
| 4                                  | 5,017 (14)                  | 1,040 (4)                       | 6,056 (9)                     | 0.3                                             |
| 5                                  | 2,310 (7)                   | 968 (3)                         | 3,278 (5)                     | 0.1                                             |
| eGFR (ml/min/1.73 m <sup>2</sup> ) |                             |                                 |                               |                                                 |
| > 60                               | 25,299 (71)                 | 5,811 (20)                      | 31,109 (48)                   | 1.1                                             |
| 31–60                              | 2,718 (3)                   | 940 (8)                         | 3,658 (6)                     | 0.16                                            |
| 15–30                              | 206 (0.5)                   | 136 (0.6)                       | 342 (0.5)                     | 0.01                                            |
| < 15                               | 142 (0.4)                   | 79 (0.3)                        | 221 (0.3)                     | -0.02                                           |
| Unknown                            | 7,170 (20)                  | 21,917 (76)                     | 29,087 (45)                   | -0.8                                            |
| ASA score                          |                             |                                 |                               |                                                 |
| I                                  | 6,404 (18)                  | 8,488 (29)                      | 14,892 (23)                   | -0.30                                           |
| II                                 | 19,929 (56)                 | 14,499 (50)                     | 34,428 (53)                   | 0.11                                            |
| III                                | 7,778 (22)                  | 4,242 (15)                      | 12,019 (19)                   | 0.17                                            |
| IV                                 | 1,104 (3)                   | 603 (2)                         | 1,707 (3)                     | 0.06                                            |
| V                                  | 5 (0.01)                    | 6 (0.02)                        | 11 (0.01)                     | -0.005                                          |
| Unknown                            | 315 (1)                     | 1,045 (4)                       | 1,360 (2)                     | -0.16                                           |
| Total                              | 35,535 (55)                 | 28,883 (45)                     | 64,418 (100)                  |                                                 |

All categories are represented as n (%) unless otherwise noted.

ASA score = American Society of Anesthesiologists physical status score; COPD = chronic obstructive pulmonary disease; eGFR = estimated glomerular filtration rate; HIV = human immunodeficiency virus; PEC = preoperative evaluation clinic.

PEC and 23 deaths from 13,964 (0.16%) patients not seen in PEC. The balance of the covariates between cohorts improved after propensity score matching (fig. 2). Characteristics after matching can be seen in table 2 (see also appendix 5). A visit to PEC resulted in a reduction in mortality (odds ratio [OR], 0.48; 95% CI, 0.22 to 0.96,  $P = 0.04$ ) by comparison of the matched cohorts using univariate logistic regression. By McNemar test,  $P$  value was less than 0.0001, and the calculated OR was 0.48 as well (95% CI, 0.23 to 0.98).

The following subspecialties were significantly less likely to utilize the PEC than other service lines: endocrine surgery, ophthalmology, gastroenterology, pulmonary medicine, pediatric surgery, and pediatric orthopedic surgery.

Characteristics of deceased patients in the matched cohorts are detailed in table 3. The FTR subanalysis on

the deceased patients in the matched cohorts resulted in a  $P$  value of 0.141, suggesting that the proportion of deaths attributable to an unanticipated surgical complication was not significantly different between the two groups (table 4).

## Discussion

An assessment in our PEC was associated with a reduction in in-hospital mortality. Although previous studies have demonstrated that anesthesiologist-led PECs decrease costs, improve OR efficiency, and increase patient satisfaction,<sup>5,9–13,25–29</sup> our study demonstrates an association between PEC and an important clinical outcome. The association with reduced mortality was noted in a broad surgical population that spanned low-risk surgery on healthy patients to high-risk surgery on high-risk patients.



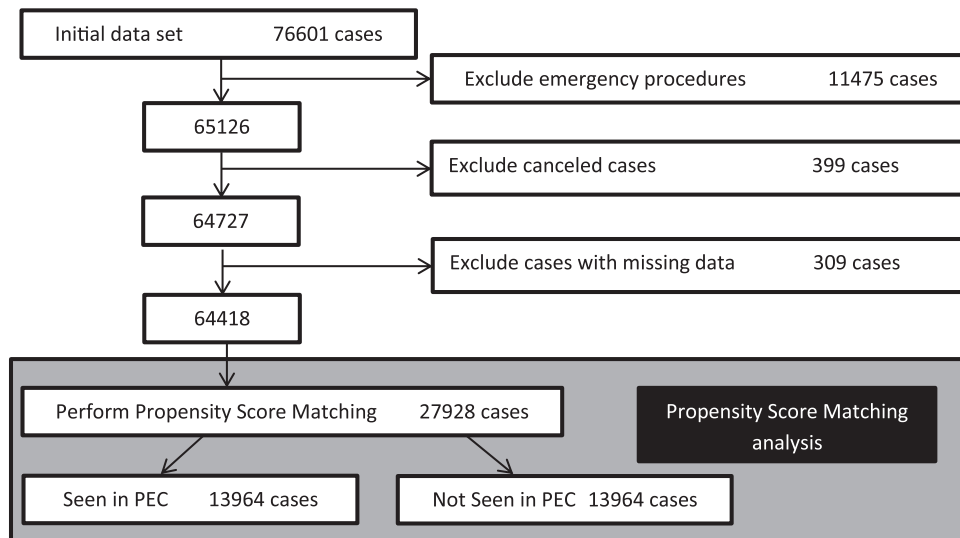

**Fig. 1.** Exclusion criteria and identification of cohorts for analyses. PEC = preoperative evaluation clinic.

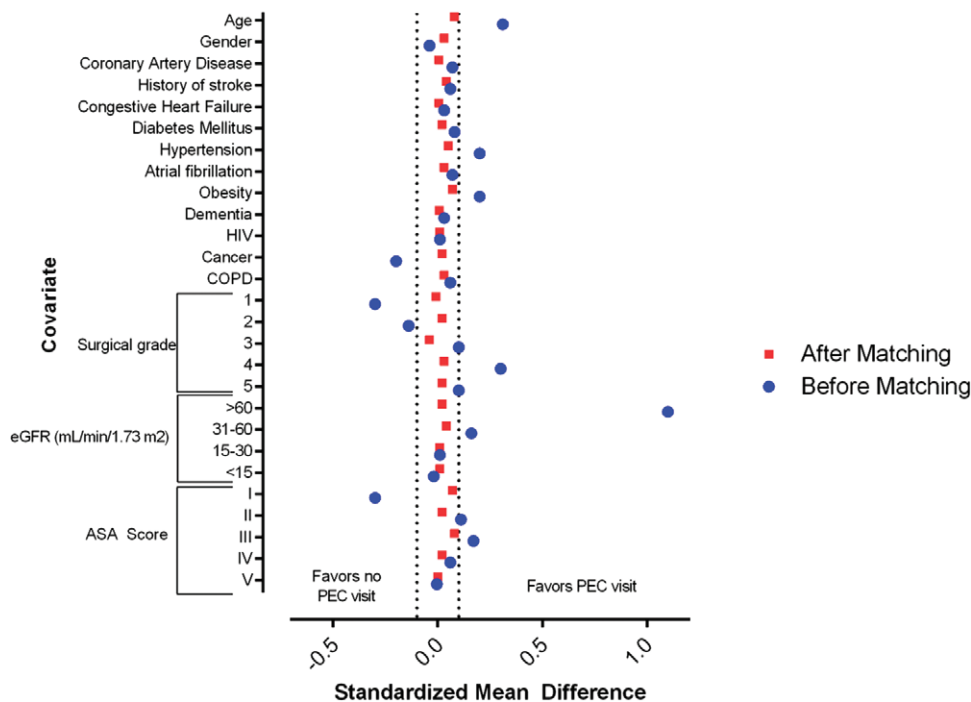

**Fig. 2.** Standardized mean differences before and after propensity score matching. Standardized mean difference with absolute value less than 0.1 was considered adequate reduction in match imbalance. Dashed lines indicate standardized mean differences of  $-0.1$  and  $0.1$ . ASA score = American Society of Anesthesiologists physical status score; COPD = chronic obstructive pulmonary disease; eGFR = estimated glomerular filtration rate; HIV = human immunodeficiency virus; PEC = preoperative evaluation clinic; Surgical grade = Johns Hopkins surgical grade.

Although there are institution-specific variations, Vetter *et al.*<sup>3</sup> have identified *patient engagement and shared decision-making*, *cross-continuum team collaboration*, and *health information exchange* as the necessary elements for successful perioperative care coordination.<sup>30</sup> Our PEC focused on early patient engagement strategies and detailed perioperative care plans that were created with input from an interdisciplinary team and documented in the electronic health record. Patient

engagement strategies used in PEC included the following: an individualized typewritten visit summary was provided for each patient; participation was encouraged in patient-modifiable risk factors such as smoking cessation and nonpharmacologic anxiety reduction; and comprehension of the presented information was evaluated using the teach-back method. Every visit summary included certain elements: standardized information about the surgery and postoperative recovery, instructions on

**Table 2.** Patient Demographics after Propensity Score Matching

| After Matching                     | Seen in PEC<br>(n = 13,964) | Not Seen in PEC<br>(n = 13,964) | Entire Cohort<br>(n = 27,928) | Standardized Mean<br>Difference after Matching |
|------------------------------------|-----------------------------|---------------------------------|-------------------------------|------------------------------------------------|
| Age, yr (mean $\pm$ SD)            | 49 $\pm$ 21                 | 48 $\pm$ 22                     | 49 $\pm$ 22                   | 0.08                                           |
| Gender                             |                             |                                 |                               | -0.03                                          |
| Male                               | 5,655 (40)                  | 5,915 (42)                      | 11,570 (41)                   |                                                |
| Female                             | 8,309 (60)                  | 8,049 (58)                      | 16,358 (59)                   |                                                |
| Coronary artery disease            | 961 (7)                     | 942 (7)                         | 1,903 (7)                     | 0.005                                          |
| History of stroke                  | 96 (0.7)                    | 50 (0.4)                        | 146 (0.5)                     | 0.04                                           |
| Congestive heart failure           | 356 (3)                     | 367 (3)                         | 723 (3)                       | -0.005                                         |
| Diabetes mellitus                  | 1,145 (8)                   | 1,208 (9)                       | 2,353 (8)                     | -0.02                                          |
| Hypertension                       | 3,563 (26)                  | 3,278 (23)                      | 6,841 (24)                    | 0.05                                           |
| Atrial fibrillation                | 301 (3)                     | 237 (3)                         | 538 (2)                       | 0.03                                           |
| Obesity                            | 955 (7)                     | 691 (5)                         | 1,646 (6)                     | 0.07                                           |
| Dementia                           | 103 (0.7)                   | 96 (0.7)                        | 199 (0.7)                     | 0.006                                          |
| HIV                                | 104 (0.7)                   | 90 (0.6)                        | 194 (0.7)                     | 0.01                                           |
| Cancer                             | 3,234 (23)                  | 3,136 (22)                      | 6,370 (23)                    | 0.02                                           |
| COPD                               | 380 (3)                     | 305 (2)                         | 685 (2)                       | 0.03                                           |
| Johns Hopkins surgical grade       |                             |                                 |                               |                                                |
| 1                                  | 1,214 (9)                   | 1,692 (12)                      | 2,906 (10)                    | -0.01                                          |
| 2                                  | 5,305 (38)                  | 4,680 (34)                      | 9,985 (36)                    | 0.02                                           |
| 3                                  | 5,352 (38)                  | 5,727 (41)                      | 11,079 (40)                   | -0.04                                          |
| 4                                  | 1,274 (9)                   | 952 (7)                         | 2,226 (8)                     | 0.03                                           |
| 5                                  | 819 (6)                     | 913 (7)                         | 1,732 (6)                     | 0.02                                           |
| eGFR (ml/min/1.73 m <sup>2</sup> ) |                             |                                 |                               |                                                |
| > 60                               | 5,624 (40)                  | 5,794 (41)                      | 11,418 (41)                   | -0.02                                          |
| 31–60                              | 1,079 (8)                   | 932 (7)                         | 2,011 (7)                     | 0.04                                           |
| 15–30                              | 139 (1)                     | 126 (0.9)                       | 265 (0.9)                     | 0.009                                          |
| < 15                               | 90 (0.6)                    | 74 (0.5)                        | 164 (0.6)                     | 0.01                                           |
| Unknown                            | 7,032 (50)                  | 7,038 (50)                      | 14,070 (50)                   | 0                                              |
| ASA score                          |                             |                                 |                               |                                                |
| I                                  | 2,826 (20)                  | 3,206 (23)                      | 6,032 (22)                    | -0.07                                          |
| II                                 | 7,209 (52)                  | 7,315 (52)                      | 14,524 (52)                   | -0.02                                          |
| III                                | 3,163 (23)                  | 2,693 (19)                      | 5,856 (21)                    | 0.08                                           |
| IV                                 | 545 (4)                     | 492 (4)                         | 1,037 (4)                     | 0.02                                           |
| V                                  | 4 (0.03)                    | 4 (0.03)                        | 8 (0.03)                      | 0                                              |
| Unknown                            | 217 (2)                     | 254 (2)                         | 471 (2)                       | -0.02                                          |
| Total                              | 13,964 (50)                 | 13,964 (50)                     | 27,928 (100)                  |                                                |

All categories are represented as n (%) unless otherwise noted.

ASA score = American Society of Anesthesiologists physical status score; COPD = chronic obstructive pulmonary disease; eGFR = estimated glomerular filtration rate; HIV = human immunodeficiency virus; PEC = preoperative evaluation clinic.

perioperative medication management, patient-specific preoperative fasting recommendations, and a contact name and phone number for PEC. The evaluation process and methods utilized in our PEC are consistent with those previously established at another teaching hospital.<sup>7</sup> Although we are unable to confirm an improvement in the level of patient preparation due to the written instructions provided in our PEC, a previous study demonstrated increased patient compliance with preoperative instructions when the patient received medication management recommendations in writing.<sup>31</sup> When applicable, smoking cessation strategies, the phone number for a smoker's quit line,<sup>32</sup> and advice on nonpharmacologic anxiety reduction methods<sup>33,34</sup> including positive imagery and meditation techniques were also provided. These components of a comprehensive preoperative patient preparation process are not new. PECs have previously been identified as an opportunity to encourage smoking cessation,<sup>35</sup> and a previous study

on the benefit of an in-person assessment with an anesthesiologist before the day of surgery demonstrated a reduction in preoperative anxiety on the day of surgery.<sup>36,37</sup> The "teach-back" method<sup>38–40</sup> was utilized to assess and enhance the level of patient comprehension of preoperative instructions. This entails asking the patient to explain the instructions back to the clinician to close the communication gap and to confirm that the patient has an accurate understanding of the information.<sup>39,40</sup> When possible, the preoperative discussion with the patient was held with a family member present in the room to enhance retention of the information. Our preoperative efforts were facilitated by enhancements that were made to the electronic health record at our institution during this same time interval: the visit summary was accessible within the electronic health record for review by all members of the perioperative team and included a care plan summary line written by the clinician in PEC.

**Table 3.** Demographics of Deceased Patients in the Matched Cohorts

|                                         | Seen in<br>PEC | Not Seen<br>in PEC |
|-----------------------------------------|----------------|--------------------|
| ASA                                     |                |                    |
| I                                       | 0              | 0                  |
| II                                      | 3 (27)         | 4 (17)             |
| III                                     | 4 (36)         | 8 (35)             |
| IV                                      | 4 (36)         | 10 (43)            |
| V                                       | 0              | 1 (4.3)            |
| Age, yr (mean $\pm$ SD)                 | 66 $\pm$ 27    | 62 $\pm$ 24        |
| Gender: Male, n (%)                     | 7 (64)         | 16 (70)            |
| Johns Hopkins surgical grade            |                |                    |
| 1                                       | 0              | 0                  |
| 2                                       | 2 (18)         | 4 (17)             |
| 3                                       | 4 (36)         | 7 (30)             |
| 4                                       | 2 (18)         | 4 (17)             |
| 5                                       | 3 (27)         | 8 (35)             |
| Cause of death                          |                |                    |
| Sepsis                                  | 4 (36)         | 7 (30)             |
| Respiratory failure                     | 3 (27)         | 7 (30)             |
| Cardiac arrest                          | 2 (18)         | 2 (8)              |
| Intraoperative hemorrhage               | 1 (9)          | 5 (21)             |
| Uncal herniation                        | 1 (9)          | 0                  |
| Multiorgan failure                      | 0              | 1 (4)              |
| Metastatic cancer                       | 0              | 1 (4)              |
| Surgical procedure                      |                |                    |
| Cardiac surgery                         | 2              | 4                  |
| Transcatheter aortic valve replacement  | 1              | 1                  |
| Mitral valve repair                     | 1              | 1                  |
| Coronary artery bypass graft            |                | 1                  |
| Left ventricle–pulmonary artery conduit |                | 1                  |
| ASD-VSD repair                          |                |                    |
| General Surgery                         | 4              | 2                  |
| Gastrectomy                             | 1              | 1                  |
| Exploratory laparoscopy                 | 1              | 1                  |
| Insertion of mediport                   | 1              |                    |
| Laparoscopic colectomy                  | 1              |                    |
| Laparoscopic cholecystectomy            |                |                    |
| Vascular surgery                        | 0              | 3                  |
| Endovascular aortic aneurysm repair     |                | 2                  |
| Above-knee amputation                   |                | 1                  |
| Thoracic surgery                        | 0              | 4                  |
| Thoracoscopy                            |                | 3                  |
| Thoracentesis                           |                | 1                  |
| Orthopedic surgery                      | 1              | 2                  |
| Total hip replacement                   | 1              | 1                  |
| Total knee replacement                  |                | 1                  |
| Repair of hip fracture                  |                |                    |
| Plastic surgery                         | 2              | 0                  |
| Cleft lip repair                        | 1              |                    |
| Microvascular free flap                 | 1              |                    |
| Gynecologic surgery                     | 1              | 0                  |
| Repair of rectovaginal fistula          | 1              |                    |
| Neurosurgery                            | 1              | 0                  |
| Aneurysm clipping                       | 1              |                    |
| Gastroenterology                        | 0              | 8                  |
| ERCP                                    |                | 1                  |
| PEG placement                           |                | 1                  |
| EGD                                     |                | 4                  |
| Colonoscopy                             |                | 2                  |

All categories are represented as n (%) unless otherwise noted.

ASA = American Society of Anesthesiologists physical status score; ASD-VSD = atrial septal defect-ventricular septal defect; EGD = esophagogastroduodenoscopy; ERCP = endoscopic retrograde cholangiopancreatography; PEC = preoperative evaluation clinic; PEG = percutaneous endoscopic gastrostomy.

**Table 4.** Number of Deaths Attributed to Failure to Rescue in Each Cohort Postpropensity Score Matching

|                                | Seen in<br>PEC (n = 11) | Not Seen in<br>PEC (n = 23) |
|--------------------------------|-------------------------|-----------------------------|
| Failure to rescue (n = 17)     | 8 (73)                  | 9 (39)                      |
| Non failure to rescue (n = 17) | 3 (27)                  | 14 (61)                     |

All categories are represented as n (%).  $P = 0.141$ .

PEC = preoperative evaluation clinic.

Previous studies on the effect of an in-person preoperative evaluation by an internal medicine physician have failed to demonstrate a positive effect on postoperative outcomes.<sup>41,42</sup> A preoperative evaluation by a physician not specifically trained in perioperative medicine has been associated with an increased length of stay and increased postoperative mortality,<sup>43</sup> whereas a PEC run by hospitalists was associated with lower mortality rates at one institution,<sup>44</sup> and attendance at an anesthesiologist-run PEC at another was independently associated with a lower incidence of postoperative mortality in patients undergoing colon surgery.<sup>45</sup> The difference in results between the studies on preoperative assessments by internists and those of anesthesiologist or hospitalist-directed assessments in a PEC may be due to the perioperativist's ability to improve coordination of care along the entire perioperative continuum, as well as the anesthesiologist's in-depth knowledge of the proposed surgery and anesthetic.

A 2009 multicenter study on the effect of an outpatient preoperative anesthesia consultation before major noncardiac surgery failed to demonstrate a reduction in 30-day and 1-yr mortality rates.<sup>46</sup> Details of the components of the preoperative anesthesia consultations were not provided, and consultations were not standardized between the participating centers; therefore, it is difficult to compare the results of that multicenter study with our single-institution analysis, or the previous single-institution study of patients undergoing colon surgery.<sup>45</sup>

Although we do not capture the rate of postdischarge mortality in our analysis, mortality after elective surgery has previously been established to occur most commonly during the hospital admission.<sup>47</sup> Our reported in-hospital mortality rate of 0.07% after elective surgery during the time frame studied is consistent with the rate reported by authors from other academic medical centers.<sup>48,49</sup>

Despite similar postoperative complication rates between the highest and lowest performing hospitals in the United States,<sup>3,50,51</sup> postoperative mortality varies widely from institution to institution.<sup>50</sup> This disparity is attributed to FTR: lack of timely recognition of the complication and appropriate management. Because efforts to reduce FTR deaths involve interventions that are enacted in a “wait and see fashion” after the complication has occurred and been recognized,<sup>16,18,52</sup> PEC should have little influence over the FTR rate. By contrast, the preoperative identification of patients at a high mortality risk may reduce non-FTR deaths by selection of appropriate surgical candidates, preoperative optimization, and enhanced care coordination. The proportion of

FTR deaths/non-FTR deaths was not statistically different between the postmatch cohorts. However, given the small sample size, it is difficult to draw conclusions regarding whether our PEC may be affecting the incidence of death after major perioperative complication.

Limitations of this study include the retrospective nature of the analysis and the possible presence of confounders that were not accounted for during propensity score matching. Propensity score matching is only as efficient as the variables chosen for matching; missing important variables limits the conclusions that can be made, and using excess or irrelevant variables limits the eventual power of the conclusion by the potential reduction in sample size. As in most retrospective analyses, we cannot determine causation. Although it did not ultimately demonstrate a significant association with a visit to PEC, *post hoc* assignment of the FTR designation is an additional source of error, as this may have led to the potential for confirmation bias. Patients were referred to PEC for evaluation if they were known to have multiple or significant medical comorbidities or were scheduled for a high-risk surgery. Multiple efforts were made to schedule the patient for the recommended assessment; however, the decision about whether or not to undergo a preoperative evaluation at the clinic was ultimately the patient's decision. Therefore, there may be an undetected difference between the patients who chose to come for a scheduled preoperative evaluation and those who did not. Because we did not directly control for this factor, this difference in patient characteristics may have also contributed to the differences in outcome observed in our study despite the large number of covariates chosen for matching. We are unable to provide data to demonstrate whether or not patients who comply with recommendations to attend PEC have a higher level of medical literacy or socioeconomic status as a group compared with those who do not, because this was not a metric that we were tracking during the time frame in which this retrospective analysis was performed. Due to the low-risk nature of the majority of procedures performed by the surgical services that underutilized PEC, we do not believe that subspecialty referral patterns have introduced a significant systemic bias.

An additional confounding factor is the timing of PEC evaluation relative to surgery. Timing between the date of PEC evaluation and date of surgery was not standardized and varied from 2 months before surgery to the day before. Some patient engagement strategies, meanwhile, may be more effective at a certain time interval before surgery, such as smoking cessation or practicing preoperative meditation to reduce anxiety.

While we hypothesize that the decrease in mortality in patients seen in PEC was due to better patient engagement, interdisciplinary team communication, and care coordination, further investigation is required to determine which elements of the PEC assessment are actually responsible for the observed association. Furthermore, whether or not these results are generalizable to other institutions with potentially different patient populations will need to be determined in future studies.

An in-person assessment at our PEC was associated with a reduction in in-hospital mortality. We believe that the value of a PEC lies in its ability to improve the quality of the perioperative process through the creation of a more robust system of preoperative assessment and preparation.

## Acknowledgments

The authors thank Thomas J. J. Blanck, M.D., Ph.D., and Jing Wang, M.D., Ph.D., Department of Anesthesiology, Perioperative Care and Pain Medicine, New York University School of Medicine, New York, New York, for reviewing the manuscript.

## Research Support

Support was provided solely from institutional and/or departmental sources.

## Competing Interests

Dr. Jain disclosed the following relationships: Dopf, P.C. (New York, New York), Schiavetti, Corgan, DiEdwards, Weinberg & Nicholson, LLP (New York, New York). The other authors declare no competing interests.

## Correspondence

Address correspondence to Dr. Blitz: Department of Anesthesiology, Perioperative Care and Pain Medicine, New York University School of Medicine, 550 1st Avenue, TH 552, New York, New York 10016. jeanna.viola@nyumc.org. This article may be accessed for personal use at no charge through the Journal Web site, [www.anesthesiology.org](http://www.anesthesiology.org).

## References

1. Grocott MP, Pearse RM: Perioperative medicine: The future of anaesthesia? *Br J Anaesth* 2012; 108:723–6
2. Kash B, Cline K, Menser T, Zhang Y: The Perioperative Surgical Home (PSH): A comprehensive literature review for the American Society of Anesthesiologists. Available at: <https://www.asahq.org/~media/link.aspx?id=F4B6FE52C7824248BF88E22020EB9C15&z=z>. Accessed August 21, 2015. College Station, Texas A&M University HSC, Center for Health Organization Transformation, 2014, pp 1–95
3. Vetter TR, Ivankova NV, Goeddel LA, McGwin G Jr, Pittet JF; UAB Perioperative Surgical Home Group: An analysis of methodologies that can be used to validate if a perioperative surgical home improves the patient-centeredness, evidence-based practice, quality, safety, and value of patient care. *ANESTHESIOLOGY* 2013; 119:1261–74
4. Dexter F, Wachtel RE: Strategies for net cost reductions with the expanded role and expertise of anesthesiologists in the perioperative surgical home. *Anesth Analg* 2014; 118:1062–71
5. Ferschl MB, Tung A, Sweitzer B, Huo D, Glick DB: Preoperative clinic visits reduce operating room cancellations and delays. *ANESTHESIOLOGY* 2005; 103:855–9
6. Correll DJ, Bader AM, Hull MW, Hsu C, Tsen LC, Hepner DL: Value of preoperative clinic visits in identifying issues with potential impact on operating room efficiency. *ANESTHESIOLOGY* 2006; 105:1254–9; discussion 6A
7. Fischer SP: Development and effectiveness of an anesthesia preoperative evaluation clinic in a teaching hospital. *ANESTHESIOLOGY* 1996; 85:196–206
8. Lee A, Hillman KM: Anesthesia preoperative evaluation clinic. *ANESTHESIOLOGY* 1997; 86:260–3



9. Pollard JB, Garnerin P, Dalman RL: Use of outpatient preoperative evaluation to decrease length of stay for vascular surgery. *Anesth Analg* 1997; 85:1307–11
10. van Klei WA, Moons KG, Rutten CL, Schuurhuis A, Knappe JT, Kalkman CJ, Grobbee DE: The effect of outpatient preoperative evaluation of hospital inpatients on cancellation of surgery and length of hospital stay. *Anesth Analg* 2002; 94:644–9
11. Kash BA, Zhang Y, Cline KM, Menser T, Miller TR: The perioperative surgical home (PSH): A comprehensive review of US and non-US studies shows predominantly positive quality and cost outcomes. *Milbank Q* 2014; 92:796–821
12. Jones S, Alnaib M, Kokkinakis M, Wilkinson M, St Clair Gibson A, Kader D: Pre-operative patient education reduces length of stay after knee joint arthroplasty. *Ann R Coll Surg Engl* 2011; 93:71–5
13. Carli F, Charlebois P, Baldini G, Cachero O, Stein B: An integrated multidisciplinary approach to implementation of a fast-track program for laparoscopic colorectal surgery. *Can J Anaesth* 2009; 56:837–42
14. Ergina PL, Gold SL, Meakins JL: Perioperative care of the elderly patient. *World J Surg* 1993; 17:192–8
15. Mayo NE, Feldman L, Scott S, Zavorsky G, Kim do J, Charlebois P, Stein B, Carli F: Impact of preoperative change in physical function on postoperative recovery: Argument supporting prehabilitation for colorectal surgery. *Surgery* 2011; 150:505–14
16. Cook D, Thompson JE, Habermann EB, Visscher SL, Dearani JA, Roger VL, Borah BJ: From 'solution shop' model to 'focused factory' in hospital surgery: Increasing care value and predictability. *Health Aff (Millwood)* 2014; 33:746–55
17. Silber JH, Williams SV, Krakauer H, Schwartz JS: Hospital and patient characteristics associated with death after surgery. A study of adverse occurrence and failure to rescue. *Med Care* 1992; 30:615–29
18. Hyder JA, Wakeam E, Adler JT, DeBord Smith A, Lipsitz SR, Nguyen LL: Comparing preoperative targets to failure-to-rescue for surgical mortality improvement. *J Am Coll Surg* 2015; 220:1096–106
19. Lee A, Kerridge RK, Chui PT, Chiu CH, Gin T: Perioperative systems as a quality model of perioperative medicine and surgical care. *Health Policy* 2011; 102:214–22
20. Sekhon JS: Multivariate and propensity score matching software with automated balance optimization: The Matching Package for R. *J Stat Software* 2011; 42:1–52
21. Charlson ME, Pompei P, Ales KL, MacKenzie CR: A new method of classifying prognostic comorbidity in longitudinal studies: Development and validation. *J Chronic Dis* 1987; 40:373–83
22. Donati A, Ruzzi M, Adrario E, Pelaia P, Coluzzi F, Gabbanelli V, Pietropaoli P: A new and feasible model for predicting operative risk. *Br J Anaesth* 2004; 93:393–9
23. Pasternak L: Preanesthesia evaluation of the surgical patient. *ASA Refresher Courses Anesthesiol* 1996; 24:205–19
24. Horwitz LI, Cuny JF, Ceresse J, Krumholz HM: Failure to rescue: Validation of an algorithm using administrative data. *Med Care* 2007; 45:283–7
25. Pollard JB, Zboray AL, Mazze RI: Economic benefits attributed to opening a preoperative evaluation clinic for outpatients. *Anesth Analg* 1996; 83:407–10
26. Pollard J: Optimizing the benefits of outpatient preoperative anesthesia evaluation. *Anesth Analg* 2002; 95:1461; author reply 1461–2
27. Hepner DL, Bader AM, Hurwitz S, Gustafson M, Tsen LC: Patient satisfaction with preoperative assessment in a preoperative assessment testing clinic. *Anesth Analg* 2004; 98:1099–105
28. Starsnic MA, Guarnieri DM, Norris MC: Efficacy and financial benefit of an anesthesiologist-directed university preadmission evaluation center. *J Clin Anesth* 1997; 9:299–305
29. Foss JF, Apfelbaum J: Economics of preoperative evaluation clinics. *Curr Opin Anaesthesiol* 2001; 14:559–62
30. Sevin C, Evdokimoff M, Sobolewski S, Taylor J, Rutherford P, Coleman EA: How-to-guide: Improving transitions from the hospital to home health care to reduce avoidable rehospitalizations. Cambridge, Institute for Healthcare Improvement, 2012
31. Vetter TR, Downing ME, Vanlandingham SC, Noles KM, Boudreaux AM: Predictors of patient medication compliance on the day of surgery and the effects of providing patients with standardized yet simplified medication instructions. *ANESTHESIOLOGY* 2014; 121:29–35
32. New York State Smoker's Quitline. Buffalo, NY, Roswell Park Cancer Institute. Available at: <http://www.nysmokefree.com>. Accessed August 11, 2015
33. New York University Langone Medical Center. Prepare for Surgery, Heal Faster Program. Edited by NYULMC. Available at: <http://nyulangone.org/patient-family-support/integrative-health-services/prepare-for-surgery-heal-faster-program>. Accessed July 1, 2015
34. Huddleston P: Prepare for Surgery, Heal Faster. A Guide of Mind-Body Techniques. Available at: <http://www.healfaster.com>. Accessed August 10, 2015
35. Quraishi SA, Orkin FK, Roizen MF: The anesthesia preoperative assessment: An opportunity for smoking cessation intervention. *J Clin Anesth* 2006; 18:635–40
36. Egbert LD, Battit G, Turndorf H, Beecher HK: The value of the preoperative visit by an anesthetist. A study of doctor-patient rapport. *JAMA* 1963; 185:553–5
37. Egbert LD, Jackson SH: Therapeutic benefit of the anesthesiologist-patient relationship. *Anesthesiology* 2013; 119:1465–8
38. Dewalt D, Callahan LF, Hawk VH, Broucksou KA, Hink A, Rudd R, Brach C: Health literacy universal precautions toolkit (prepared for North Carolina Network Consortium, The Cecil G. Sheps Center for Health Services Research, The University of North Carolina at Chapel Hill, under contract no. HHS290200710014). Rockville, Agency for Healthcare Research and Quality, 2010, pp 28–30
39. Farrell MH, Kuruvilla P, Eskra KL, Christopher SA, Brienza RS: A method to quantify and compare clinicians' assessments of patient understanding during counseling of standardized patients. *Patient Educ Couns* 2009; 77:128–35
40. Caplin M, Saunders T: Utilizing teach-back to reinforce patient education: A step-by-step approach. *Orthop Nurs* 2015; 34:365–8; quiz 369–70
41. Auerbach AD, Rasic MA, Sehgal N, Ide B, Stone B, Maselli J: Opportunity missed: Medical consultation, resource use, and quality of care of patients undergoing major surgery. *Arch Intern Med* 2007; 167:2338–44
42. Macpherson DS, Lofgren RP: Outpatient internal medicine preoperative evaluation: A randomized clinical trial. *Med Care* 1994; 32:498–507
43. Wijesundera DN, Austin PC, Beattie WS, Hux JE, Laupacis A: Outcomes and processes of care related to preoperative medical consultation. *Arch Intern Med* 2010; 170:1365–74
44. Vazirani S, Lankarani-Fard A, Liang LJ, Stelzner M, Asch SM: Perioperative processes and outcomes after implementation of a hospitalist-run preoperative clinic. *J Hosp Med* 2012; 7:697–701
45. Carlisle J, Swart M, Dawe EJ, Chadwick M: Factors associated with survival after resection of colorectal adenocarcinoma in 314 patients. *Br J Anaesth* 2012; 108:430–5
46. Wijesundera DN, Austin PC, Beattie WS, Hux JE, Laupacis A: A population-based study of anesthesia consultation before major noncardiac surgery. *Arch Intern Med* 2009; 169:595–602

47. Palmqvist CL, Ariyaratnam R, Watters DA, Laing GL, Stupart D, Hider P, Ng-Kamstra JS, Wilson L, Clarke DL, Hagander L, Greenberg SL, Gruen RL: Monitoring and evaluating surgical care: Defining perioperative mortality rate and standardising data collection. *Lancet* 2015; 385(suppl 2):S27
48. Sigakis MJ, Bittner EA, Wanderer JP: Validation of a risk stratification index and risk quantification index for predicting patient outcomes: In-hospital mortality, 30-day mortality, 1-year mortality, and length-of-stay. *ANESTHESIOLOGY* 2013; 119:525–40
49. Whitlock EL, Feiner JR, Chen LL: Perioperative mortality, 2010 to 2014: A retrospective cohort study using the national anesthesia clinical outcomes registry. *ANESTHESIOLOGY* 2015; 123:1312–21
50. Ghaferi AA, Birkmeyer JD, Dimick JB: Variation in hospital mortality associated with inpatient surgery. *N Engl J Med* 2009; 361:1368–75
51. Ghaferi AA, Birkmeyer JD, Dimick JB: Complications, failure to rescue, and mortality with major inpatient surgery in medicare patients. *Ann Surg* 2009; 250:1029–34
52. Taenzer AH, Pyke JB, McGrath SP: A review of current and emerging approaches to address failure-to-rescue. *ANESTHESIOLOGY* 2011; 115:421–31

## Appendix 1: Screening Tool Used in Surgeons' Offices to Determine Whether or not a Patient Would Be Referred for an Evaluation in the Preoperative Evaluation Clinic

**Patients Must Go to New York University Langone Medical Center Preadmission Testing if They Meet Any of the following Criteria\***

- History of coronary artery disease, cardiac stents, myocardial infarction, congestive heart failure, cardiomyopathy, pacemaker/implantable cardioverter defibrillator, valvular heart disease
- Poorly controlled hypertension (systolic blood pressure more than 160 mmHg, diastolic blood pressure more than 110 mmHg)
- History of severe chronic obstructive pulmonary disease or severe asthma
- Severe pulmonary hypertension
- +STOP BANG, history of obstructive sleep apnea, or currently use continuous positive airway pressure, bilevel positive airway pressure, or home oxygen
- Diabetic requiring insulin therapy
- Liver failure
- Renal failure or significant renal insufficiency (creatinine more than 2 mg/dl)
- History of organ transplant (kidney or liver)
- Morbid obesity with body mass index more than 50 kg/m<sup>2</sup>
- Severe peripheral vascular disease
- History of anesthetic complications
- History of cerebrovascular accident
- History of chronic pain

\*Please refer to surgical classification grid. Patients undergoing category 1 or 2 surgeries may not need to be evaluated by an anesthesiologist preoperatively while in preadmission testing.

## Surgical Classification System Category 1

1. Minimal risk to the patient independent of anesthesia
2. Minimally invasive procedure with little or no blood loss
3. Often done in an office setting with the operating room used principally for anesthesia and monitoring

| Includes                                       | Excludes                                                                   |
|------------------------------------------------|----------------------------------------------------------------------------|
| Breast biopsy                                  | Open exposure of internal body organs                                      |
| Excision of minor skin or subcutaneous lesions | Repair of vascular or neurologic structures                                |
| Myringotomy tubes                              | Placement of prosthetic devices                                            |
| Hysteroscopy                                   | Entry into the abdomen, thorax, neck, cranium, or extremities              |
| Cystoscopy                                     | Postoperative monitored care setting (intensive care unit, step-down unit) |
| Vasectomy                                      | Resection of major body organs                                             |
| Cataract extraction with lens insertion        |                                                                            |
| Circumcision                                   |                                                                            |
| Fiberoptic bronchoscopy                        |                                                                            |

## Category 2

1. Minimal to moderately invasive procedure
2. Blood loss less than 500 ml
3. Mild risk to patient independent of anesthesia

| Includes                             | Excludes                                                                   |
|--------------------------------------|----------------------------------------------------------------------------|
| Diagnostic laparoscopy               | Open exposure of internal body organs                                      |
| Dilation and curettage               | Repair of vascular or neurologic structures                                |
| Fallopian tube ligation              | Placement of prosthetic devices                                            |
| Arthroscopy                          | Postoperative monitored care setting (intensive care unit, step-down unit) |
| Inguinal hernia repair               | Open exposure of the abdomen, thorax, neck, cranium                        |
| Laparoscopic lysis of adhesions      | Resection of major body organs                                             |
| Tonsillectomy/adenoidectomy          |                                                                            |
| Umbilical hernia repair              |                                                                            |
| Vitrectomy, scleral buckle procedure |                                                                            |
| Septoplasty/rhinoplasty              |                                                                            |
| Laparoscopic cholecystectomy         |                                                                            |
| Extensive superficial procedures     |                                                                            |

**Category 3**

1. Moderately to significantly invasive procedures
2. Blood loss potential 500 to 1,500 ml
3. Moderate risk to patient independent of anesthesia

| Includes                                                 | Excludes                                    |
|----------------------------------------------------------|---------------------------------------------|
| Thyroidectomy                                            | Open thoracic or intracranial procedure     |
| Hysterectomy                                             | Major procedure on the oropharynx           |
| Myomectomy                                               | Major vascular, skeletal, neurologic repair |
| Cystectomy                                               |                                             |
| Laminectomy                                              |                                             |
| Open cholecystectomy                                     |                                             |
| Hip/knee replacement                                     |                                             |
| Nephrectomy                                              |                                             |
| Major laparoscopic surgeries                             |                                             |
| Resection, reconstructive surgery of the digestive tract |                                             |

**Category 4**

1. Highly invasive procedure
2. Blood loss greater than 1,500 ml
3. Major risk to the patient independent of anesthesia

| Includes                                                              |
|-----------------------------------------------------------------------|
| Major orthopedic or spinal reconstruction                             |
| Major reconstruction of the gastrointestinal tract                    |
| Major genitourinary surgery (radical retropubic prostatectomy)        |
| Major vascular surgery without postoperative intensive care unit stay |

**Category 5**

1. Highly invasive procedure
2. Blood loss greater than 1,500 ml
3. Critical risk to the patient independent of anesthesia
4. Usual postoperative intensive care unit stay with invasive monitoring

| Includes                 |
|--------------------------|
| Cardiothoracic procedure |
| Intracranial procedure   |

## Appendix 2.

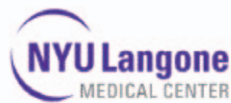

Patient Name: \_\_\_\_\_

Medical Record Number: \_\_\_\_\_

### NYU Hospitals Center Pre-Admission Testing Patient Screening Form

|                                   |                          |                                                                                               |  |                                     |                          |                                                                            |  |
|-----------------------------------|--------------------------|-----------------------------------------------------------------------------------------------|--|-------------------------------------|--------------------------|----------------------------------------------------------------------------|--|
| <b>Patient Name:</b>              |                          |                                                                                               |  | <b>Date of Birth:</b>               |                          |                                                                            |  |
| <b>Primary Care Provider Dr.:</b> |                          |                                                                                               |  | <b>Cardiologist/Specialist Dr.:</b> |                          |                                                                            |  |
| <b>Phone:</b>                     |                          |                                                                                               |  | <b>Phone:</b>                       |                          |                                                                            |  |
| <b>Surgical Procedure*:</b>       |                          |                                                                                               |  | <b>Date of Surgery:</b>             |                          |                                                                            |  |
|                                   |                          |                                                                                               |  | <b>Surgeon:</b>                     |                          |                                                                            |  |
|                                   |                          |                                                                                               |  | <b>Phone</b>                        |                          |                                                                            |  |
| <b>BP:</b>                        |                          | <b>HR:</b>                                                                                    |  | Wheelchair bound?                   |                          | Bedridden?                                                                 |  |
| Height:                           |                          | Weight:                                                                                       |  |                                     |                          |                                                                            |  |
| <b>YES</b>                        | <b>NO</b>                |                                                                                               |  | <b>YES</b>                          | <b>NO</b>                |                                                                            |  |
| <input type="checkbox"/>          | <input type="checkbox"/> | Being treated for high blood pressure? <i>If yes, how many years?</i>                         |  | <input type="checkbox"/>            | <input type="checkbox"/> | Had a cardiac valve replacement or repair?                                 |  |
| <input type="checkbox"/>          | <input type="checkbox"/> | Has chest pain with walking/normal activity? With exercise?                                   |  | <input type="checkbox"/>            | <input type="checkbox"/> | Has a pacemaker or defibrillator?                                          |  |
| <input type="checkbox"/>          | <input type="checkbox"/> | Had a coronary bypass or angioplasty?                                                         |  | <input type="checkbox"/>            | <input type="checkbox"/> | Has an aortic aneurysm?                                                    |  |
| <input type="checkbox"/>          | <input type="checkbox"/> | Had a heart attack?<br><i>If yes, how many?: When?:</i>                                       |  | <input type="checkbox"/>            | <input type="checkbox"/> | Has peripheral vascular disease?                                           |  |
| <input type="checkbox"/>          | <input type="checkbox"/> | Has a cardiac stent(s)?<br><i>If yes, how many?: When?:</i>                                   |  | <input type="checkbox"/>            | <input type="checkbox"/> | Ever had a stress test?<br><i>If yes, where?: When?: Why?:</i>             |  |
| <input type="checkbox"/>          | <input type="checkbox"/> | Has congestive heart failure (CHF)?                                                           |  | <input type="checkbox"/>            | <input type="checkbox"/> | Ever had an echocardiogram?<br><i>If yes, where?: When?: Why?:</i>         |  |
| <input type="checkbox"/>          | <input type="checkbox"/> | Has an arrhythmia?                                                                            |  | <input type="checkbox"/>            | <input type="checkbox"/> | Ever had a cardiac catheterization?<br><i>If yes, where?: When?: Why?:</i> |  |
| <input type="checkbox"/>          | <input type="checkbox"/> | Has a heart murmur or valve disease?                                                          |  | [Hatched Area]                      |                          |                                                                            |  |
| <input type="checkbox"/>          | <input type="checkbox"/> | Takes daily medication for asthma?                                                            |  | <input type="checkbox"/>            | <input type="checkbox"/> | Has difficulty breathing?                                                  |  |
| <input type="checkbox"/>          | <input type="checkbox"/> | Has a history of COPD?                                                                        |  | <input type="checkbox"/>            | <input type="checkbox"/> | Uses supplemental oxygen?                                                  |  |
| <input type="checkbox"/>          | <input type="checkbox"/> | Current smoker? <i>If yes, how many packs / day?: How many years have you been a smoker?:</i> |  | <input type="checkbox"/>            | <input type="checkbox"/> | Has a history of sleep apnea? CPAP-Continuous Positive Airway Pressure?    |  |
| <input type="checkbox"/>          | <input type="checkbox"/> | Had a recent cold, fever or flu symptoms?                                                     |  | <input type="checkbox"/>            | <input type="checkbox"/> | Ever been witnessed to stop breathing while asleep?                        |  |
| <input type="checkbox"/>          | <input type="checkbox"/> | Has diabetes? <i>If yes, for how many years?: Complications?:</i>                             |  | <input type="checkbox"/>            | <input type="checkbox"/> | Takes insulin?                                                             |  |
| <input type="checkbox"/>          | <input type="checkbox"/> | Has kidney disease (other than kidney stones)?                                                |  | <input type="checkbox"/>            | <input type="checkbox"/> | Had a history of Hepatitis A / B / C / D? (circle)                         |  |
| <input type="checkbox"/>          | <input type="checkbox"/> | Has liver disease?                                                                            |  | [Hatched Area]                      |                          |                                                                            |  |
| <input type="checkbox"/>          | <input type="checkbox"/> | Drinks alcohol every day?<br><i>If yes, how many drinks/day?:</i>                             |  | <input type="checkbox"/>            | <input type="checkbox"/> | Uses recreational drugs?<br><i>If yes, specify:</i>                        |  |

Please Turn Over To Continue



## Appendix 2. (Continued)



**NYU Hospitals Center**

**Pre-Admission Testing Patient Screening Form**

Patient Name: \_\_\_\_\_

Medical Record Number: \_\_\_\_\_

| YES                                                                   | NO                       |                                                                              | YES                                 | NO                       |                                                                              |
|-----------------------------------------------------------------------|--------------------------|------------------------------------------------------------------------------|-------------------------------------|--------------------------|------------------------------------------------------------------------------|
| <input type="checkbox"/>                                              | <input type="checkbox"/> | Has a history of anemia?                                                     | <input type="checkbox"/>            | <input type="checkbox"/> | Has a history of sickle cell disease or trait?                               |
| <input checked="" type="checkbox"/>                                   | <input type="checkbox"/> | Takes any blood thinners?                                                    | <input type="checkbox"/>            | <input type="checkbox"/> | Has a history of cancer?                                                     |
| <input type="checkbox"/>                                              | <input type="checkbox"/> | Takes Aspirin or Ibuprofen regularly?                                        | <input type="checkbox"/>            | <input type="checkbox"/> | Is currently on chemotherapy?                                                |
| <input type="checkbox"/>                                              | <input type="checkbox"/> | Has a seizure disorder or takes anti-seizure medications?                    | <input type="checkbox"/>            | <input type="checkbox"/> | Has neuromuscular disease (Parkinson's, ALS etc)?                            |
| <input checked="" type="checkbox"/>                                   | <input type="checkbox"/> | Ever had a stroke(CVA) or TIA? <i>If yes, when?:</i>                         | <input checked="" type="checkbox"/> | <input type="checkbox"/> | Has a brain tumor, brain aneurysm or other vascular lesion of the brain?     |
| <input checked="" type="checkbox"/>                                   | <input type="checkbox"/> | Has a history of difficult intubation?                                       | <input checked="" type="checkbox"/> | <input type="checkbox"/> | Has a history of severe reaction to anesthesia?                              |
| <input checked="" type="checkbox"/>                                   | <input type="checkbox"/> | Has a history of malignant hyperthermia?                                     | <input checked="" type="checkbox"/> | <input type="checkbox"/> | Suffers from chronic pain?                                                   |
| <input type="checkbox"/>                                              | <input type="checkbox"/> | Has a history of severe nausea and vomiting after anesthesia?                | <input type="checkbox"/>            | <input type="checkbox"/> | Is possibility pregnant?<br><i>LMP:</i>                                      |
| <input type="checkbox"/>                                              | <input type="checkbox"/> | Has an autoimmune disease (e.g. Rheumatoid Arthritis, Sarcoidosis or Lupus)? | <input type="checkbox"/>            | <input type="checkbox"/> | Other medical comorbidities not otherwise mentioned? <i>If yes, specify:</i> |
| EKG results good for 6 months. Chemistry lab results good for 30 days |                          |                                                                              |                                     |                          |                                                                              |

Current medication list:

Medication: \_\_\_\_\_ Dose: \_\_\_\_\_

### Appendix 3: Decision Grid Utilized in the Preoperative Evaluation Clinic to Assign Patients to PEC Providers

| No. of Dark Boxes<br>Checked YES on<br>Form | Surgical Class         |                                                          |                                                          |                                               |                                               |
|---------------------------------------------|------------------------|----------------------------------------------------------|----------------------------------------------------------|-----------------------------------------------|-----------------------------------------------|
|                                             | 1                      | 2                                                        | 3                                                        | 4                                             | 5                                             |
| 0                                           | Fast track*            | Fast track*                                              | Fast track*                                              | PAT visit                                     | PAT visit                                     |
| 1                                           | Fast track*            | Fast track*                                              | Medical evaluation†                                      | PAT visit                                     | PAT visit                                     |
| 2                                           | Medical<br>evaluation† | PAT visit + anesthesia<br>NP and medical<br>evaluations† | PAT visit + anesthesia<br>NP and medical<br>evaluations† | PAT visit +<br>anesthesiologist<br>evaluation | PAT visit +<br>anesthesiologist<br>evaluation |
| ≥ 3                                         | Medical<br>evaluation† | PAT visit + anesthesia<br>NP and medical<br>evaluations† | PAT visit + anesthesia<br>NP and medical<br>evaluations† | PAT visit +<br>anesthesiologist<br>evaluation | PAT visit +<br>anesthesiologist<br>evaluation |

This grid was modified from the version used at the Cleveland Clinic, Cleveland, Ohio. Surgical classification system is outlined in appendix 1. Patient screening form is provided in appendix 2.

\*Fast-track refers to patients who will receive a phone call before the day of surgery to review their medical history and provide education. †Medical evaluation refers to any preoperative medical or specialty consultation as indicated by New York University Langone Medical Center preoperative testing policy. This consult note should be available for review ≥72h before scheduled surgery or the in-person preadmission testing clinic (PAT; preoperative evaluation clinic) visit whenever possible. NP = nurse practitioner; PEC = preoperative evaluation clinic.

### Appendix 4: Propensity Model and Coding Used for the Analysis

#assign "seen at pat" as the treatment variable

```
Tr<-mortality$seenatpat
```

#determine propensity scores by logistic regression

```
glm.PATseen<-glm(seenatpat~ Age + GENDER + had_CHF + had_cancer + CKD_Stage + ASA_RATING + Pasternak_Score,family=binomial,data=mortality)
```

```
> summary(glm.PATseen)
```

Call:

```
glm(formula = seenatpat~ Age + GENDER + had_CHF + had_cancer +  
    CKD_Stage + ASA_RATING + Pasternak_Score, family = binomial,  
    data = mortality)
```

Deviance Residuals:

```
    Min 1Q Median 3Q Max  
-2.3761 -0.7841 0.4441 0.6524 2.7957
```

### Coefficients

|                  | Estimate   | SE        | z Value | Pr(> z )    |
|------------------|------------|-----------|---------|-------------|
| (Intercept)      | -2.8271663 | 0.0865762 | -32.655 | < 2e-16 *** |
| Age              | -0.0037296 | 0.0005491 | -6.792  | 1.1e-11 *** |
| GENDERMale       | -0.2267150 | 0.0200254 | -11.321 | < 2e-16 *** |
| had_CHFTRUE      | -0.6720033 | 0.0790311 | -8.503  | < 2e-16 *** |
| had_cancerTRUE   | -0.5541710 | 0.0253422 | -21.867 | < 2e-16 *** |
| CKD Stage 2      | 2.5461838  | 0.0216003 | 117.877 | < 2e-16 *** |
| CKD Stage 3      | 2.2734332  | 0.0453699 | 50.109  | < 2e-16 *** |
| CKD Stage 4      | 1.7080766  | 0.1194818 | 14.296  | < 2e-16 *** |
| CKD Stage 5      | 2.0146477  | 0.1514618 | 13.301  | < 2e-16 *** |
| ASA_RATINGI      | 1.0536310  | 0.0791061 | 13.319  | < 2e-16 *** |
| ASA_RATINGII     | 1.2244513  | 0.0771413 | 15.873  | < 2e-16 *** |
| ASA_RATINGIII    | 1.2921674  | 0.0795674 | 16.240  | < 2e-16 *** |
| ASA_RATINGIV     | 0.8923236  | 0.1026397 | 8.694   | < 2e-16 *** |
| ASA_RATINGV      | -0.3403222 | 0.6620365 | -0.514  | 0.607       |
| Pasternak_Score2 | 0.9527839  | 0.0358602 | 26.569  | < 2e-16 *** |
| Pasternak_Score3 | 1.0013711  | 0.0350237 | 28.591  | < 2e-16 *** |
| Pasternak_Score4 | 1.8326468  | 0.0501050 | 36.576  | < 2e-16 *** |
| Pasternak_Score5 | 1.4622910  | 0.0583625 | 25.055  | < 2e-16 *** |

---

Significance codes: 0 ‘\*\*\*’ 0.001 ‘\*\*’ 0.01 ‘\*’ 0.05 ‘.’ 0.1 ‘.’ 1  
 (Dispersion parameter for binomial family taken to be 1)  
 Null deviance: 88,614 on 64,417 degrees of freedom  
 Residual deviance: 64,383 on 64,400 degrees of freedom  
 AIC: 64419  
 Number of Fisher scoring iterations: 4  
 #perform matching  
 X<-glm.PATseen\$fitted  
 rr.PATseen<-Match(Tr=Tr,X=glm.PATseen\$fitted,caliper=0.  
 2,Weight=1,replace=FALSE)

#assess post match covariate balance  
 MatchBalance(seenatpat~Age+GENDER+had\_AFIB+had\_  
 CAD+had\_CHF+had\_CVA+had\_DM+had HTN+had\_  
 cancer+had\_HIV+had\_dementia+had COPD+had\_  
 OBESITY+CKD\_Stage+ASA\_RATING+Pasternak\_  
 Score,match.out=rr.PATseen,nboots=500,data=mortality)  
 PAT = preadmission testing clinic; PEC = preoperative  
 evaluation clinic.

## Appendix 5: Characteristics of the Patients Included in the Matched Cohort Used for Analysis and Those Who Remained Unmatched

|                                           | Matched (Included in PS Analysis) | Unmatched     |
|-------------------------------------------|-----------------------------------|---------------|
| Age, yr (mean $\pm$ SD)                   | 49 $\pm$ 22                       | 48 $\pm$ 20   |
| Gender, n (%)                             |                                   |               |
| Male                                      | 11,570 (41)                       | 17,417 (48)   |
| Female                                    | 16,358 (59)                       | 19,023 (52)   |
| Comorbidities, n (%)                      |                                   |               |
| Coronary artery disease                   | 1,903 (6.8)                       | 1,650 (4.5)   |
| History of stroke                         | 146 (0.5)                         | 176 (0.5)     |
| Congestive heart failure                  | 723 (3)                           | 420 (1.1)     |
| Diabetes mellitus                         | 2,353 (8.4)                       | 2,926 (8.0)   |
| Hypertension                              | 6,841 (24)                        | 9,050 (25)    |
| Atrial fibrillation                       | 538 (1.9)                         | 412 (1.1)     |
| Obesity                                   | 1,646 (5.9)                       | 2,477 (6.8)   |
| Dementia                                  | 199 (0.7)                         | 159 (0.4)     |
| Human immunodeficiency virus              | 194 (0.7)                         | 256 (0.7)     |
| Cancer                                    | 6,370 (23)                        | 6,712 (18)    |
| COPD                                      | 685 (2.5)                         | 619 (1.7)     |
| Johns Hopkins surgical grade, n (%)       |                                   |               |
| 1                                         | 2,906 (10)                        | 4,054 (11)    |
| 2                                         | 9,985 (36)                        | 13,029 (36)   |
| 3                                         | 11,079 (40)                       | 13,993 (38)   |
| 4                                         | 2,226 (8.0)                       | 3,919 (11)    |
| 5                                         | 1,732 (6)                         | 1,445 (4)     |
| eGFR (ml/min/1.73 m <sup>2</sup> ), n (%) |                                   |               |
| > 60                                      | 11,418 (41)                       | 19,720 (54)   |
| 31–60                                     | 2,011 (7.2)                       | 1,635 (4.5)   |
| 15–30                                     | 265 (0.9)                         | 75 (0.2)      |
| < 15                                      | 164 (0.6)                         | 57 (0.2)      |
| Unknown                                   | 14,070 (50.4)                     | 14,953 (41)   |
| ASA score, n (%)                          |                                   |               |
| I                                         | 6,032 (21.6)                      | 8,877 (24.36) |
| II                                        | 14,524 (52)                       | 19,830 (54.4) |
| III                                       | 5,856 (21)                        | 6,155 (16.9)  |
| IV                                        | 1,037 (3.7)                       | 669 (1.8)     |
| V                                         | 8 (0.03)                          | 3 (0.008)     |
| Unknown                                   | 471 (1.68)                        | 906 (2.5)     |
| Total, n (%)                              | 27,928 (100)                      | 36,440 (100)  |

ASA = American Society of Anesthesiologists physical status score; COPD = chronic obstructive pulmonary disease; eGFR = estimated glomerular filtration rate; PS = physical status.
